# Supplementary material for: Fate and transformation of silver nanoparticles in different biological conditions
Source: publisher site journal article supplement (doi:10.3762/bjnano.12.53), 2021-07-07
Supplement: Additional file 1 [file 2190-4286-12-53-S1.pdf]

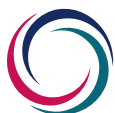

## Supporting Information

for

### **Fate and transformation of silver nanoparticles in different biological conditions**

Barbara Pem, Marija Ćurlin, Darija Domazet Jurašin, Valerije Vrčec, Rinea Barbir, Vedran Micek, Raluca M. Fratila, Jesus M. de la Fuente and Ivana Vinković Vrčec

*Beilstein J. Nanotechnol.* **2021**, *12*, 665–679. [doi:10.3762/bjnano.12.53](https://doi.org/10.3762/bjnano.12.53)

### **Experimental parameters of AgNPs diluted in different biological media**

**Table S1:** Hydrodynamic diameter and % volume distribution of AgNPs after 1, 4, and 24h in selected media, determined by DLS. The abbreviations of all media are explained in the Table 1 of the main manuscript.

| Media      | AOT AgNP                                    |                                                |                                                                 | PVP AgNP                                                              |                                                                    |                                                | PLL AgNP                                     |                                                                      |                                                                       |
|------------|---------------------------------------------|------------------------------------------------|-----------------------------------------------------------------|-----------------------------------------------------------------------|--------------------------------------------------------------------|------------------------------------------------|----------------------------------------------|----------------------------------------------------------------------|-----------------------------------------------------------------------|
|            | 1h                                          | 4h                                             | 24h                                                             | 1h                                                                    | 4h                                                                 | 24h                                            | 1h                                           | 4h                                                                   | 24h                                                                   |
| DMEM       | 946.4 ± 20.3<br>(99%)                       | 129.2 ± 55.8<br>(1%)<br>887.2 ± 152.7<br>(99%) | 101.1 ± 10.1<br>(8%)<br>753.8 ± 148.4<br>(92%)                  | 20.7 ± 0.0<br>(13%)<br>68.7 ± 11.7<br>(18%)<br>506.6 ± 141.2<br>(69%) | 846.4 ± 99.8<br>(100%)                                             | 168.4 ± 75.0<br>(1%)<br>860.3 ± 262.6<br>(99%) | 25.1 ± 0.0<br>(4%)<br>499.4 ± 135.0<br>(96%) | 907.7 V 73.2<br>(100%)                                               | 98.0 ± 39.0<br>(4%)<br>635.1 ± 162.1<br>(93%)                         |
| DMEM + BSA | 8.6 ± 2.3<br>(82%)<br>267.2 ± 43.4<br>(18%) | 9.2 ± 3.7<br>(88%)<br>527.3 ± 144.5<br>(12%)   | 8.9 ± 3.4<br>(100%)                                             | 5.8 ± 1.6<br>(93%)<br>31.2 ± 4.2<br>(7%)                              | 4.9 ± 1.4<br>(90%)<br>33.6 ± 2.3<br>(10%)                          | 5.6 ± 1.3<br>(95%)<br>32.7 ± 5.4<br>(5%)       | 8.9 ± 2.8<br>(91%)<br>58.2 ± 4.8<br>(9%)     | 9.6 ± 4.2<br>(82%)<br>45.4 ± 5.7<br>(18%)                            | 9.6 ± 2.2<br>(92%)<br>59.2 ± 7.8<br>(8%)                              |
| CYS        | 2.8 ± 0.5<br>(98%)<br>22.4 ± 2.6<br>(1%)    | 2.7 ± 0.7<br>(99%)<br>24.5 ± 1.4<br>(1%)       | 3.5 ± 0.3<br>(99%)<br>28.7 ± 4.2<br>(1%)                        | 17.8 ± 0.0<br>(11%)<br>103.4 ± 4.6<br>(89%)                           | 10.7 ± 3.7<br>(43%)<br>54.7 ± 0.0<br>(17%)<br>101.7 ± 9.4<br>(40%) | 12.7 ± 0.1<br>(18%)<br>63.6 ± 5.7<br>(82%)     | 7.3 ± 1.4<br>(96%)<br>44.9 ± 6.2<br>(4%)     | 10.0 ± 2.9<br>(31%)<br>66.9 ± 28.1<br>(61%)<br>529.5 ± 208.7<br>(8%) | 13.9 ± 0.9<br>(16%)<br>61.0 ± 10.8<br>(38%)<br>771.1 ± 205.1<br>(46%) |
| CYS + BSA  | 3.2 ± 0.1<br>(99%)<br>23.1 ± 1.9<br>(1%)    | 2.0 ± 0.5<br>(99%)<br>21.8 ± 1.4<br>(1%)       | 1.3 ± 0.0<br>(14%)<br>5.4 ± 2.5<br>(85%)<br>31.1 ± 12.5<br>(1%) | 2.1 ± 0.6<br>(18%)<br>5.1 ± 0.9<br>(80%)<br>38.7 ± 3.2<br>(2%)        | 1.9 ± 0.0<br>(13%)<br>4.2 ± 0.6<br>(86%)<br>35.8 ± 0.8<br>(1%)     | 6.8 ± 0.6<br>(98%)<br>83.0 ± 7.2<br>(2%)       | 90.3 ± 3.8<br>(23%)<br>176.5 ± 24.8<br>(77%) | 30.0 ± 0.5<br>(9%)<br>90.7 ± 3.4<br>(36%)<br>193.7 ± 21.7<br>(55%)   | 94.5 ± 0.0<br>(13%)<br>150.6 ± 21.0<br>(87%)                          |
| GSH        | 128.8 ± 2.6<br>(100%)                       | 190.1 ± 3.3<br>(100%)                          | 585.5 ± 74.8<br>(99%)                                           | 45.3 ± 0.0<br>(2%)<br>423.0 ± 45.0<br>(98%)                           | 264.7 ± 5.6<br>(100%)                                              | 455.4 ± 17.9<br>(100%)                         | 5.6 ± 1.6<br>(93%)<br>29.1 ± 11.8<br>(7%)    | 5.6 ± 1.6<br>(63%)<br>23.5 ± 6.6<br>(37%)                            | 6.0 ± 0.8<br>(95%)<br>37.2 ± 3.5<br>(5%)                              |
| GSH + BSA  | 2.0 ± 0.0<br>(13%)<br>7.5 ± 1.0<br>(87%)    | 6.3 ± 0.9<br>(99%)<br>35.9 ± 0.0<br>(1%)       | 6.2 ± 0.6<br>(100%)                                             | 5.4 ± 0.1<br>(99%)<br>32.4 ± 0.0<br>(1%)                              | 5.3 ± 0.4<br>(99%)<br>35.6 ± 0.0<br>(1%)                           | 4.9 ± 0.2<br>(94%)<br>31.6 ± 0.5<br>(6%)       | 9.7 ± 2.8<br>(91%)<br>60.2 ± 51.8<br>(9%)    | 9.3 ± 2.2<br>(79%)<br>46.1 ± 6.7<br>(21%)                            | 9.8 ± 3.2<br>(92%)<br>61.2 ± 8.4<br>(8%)                              |
| ALF        | 748.7 ± 97.5<br>(99%)                       | 758.7 ± 103.5<br>(100%)                        | 84.4 ± 19.0<br>(4%)<br>356.1 ± 141.2<br>(96%)                   | 7.4 ± 1.2<br>(100%)                                                   | 7.1 ± 0.9<br>(99%)<br>40.6 ± 6.4<br>(1%)                           | 6.8 ± 2.6<br>(99%)<br>44.2 ± 0.0<br>(1%)       | 39.9 ± 12.6<br>(5%)<br>978.1 ± 28.0<br>(95%) | 87.7 ± 9.2<br>(5%)<br>755.2 ± 120.5<br>(95%)                         | 19.6 ± 0.0<br>(6%)<br>47.4 ± 7.8<br>(14%)                             |

|     |                       |                         |                         |                                          |                                                                 |                                            |                                           |                                             |                                                                    |
|-----|-----------------------|-------------------------|-------------------------|------------------------------------------|-----------------------------------------------------------------|--------------------------------------------|-------------------------------------------|---------------------------------------------|--------------------------------------------------------------------|
|     |                       |                         |                         |                                          |                                                                 |                                            |                                           |                                             | 363.7 ± 42.1<br>(80%)                                              |
| AGF | 811.5 ± 48.7<br>(99%) | 762.7 ± 140.6<br>(100%) | 644.0 ± 170.3<br>(100%) | 9.2 ± 2.1<br>(99%)<br>48.0 ± 0.0<br>(1%) | 3.9 ± 0.0<br>(13%)<br>10.6 ± 2.0<br>(80%)<br>70.6 ± 5.9<br>(7%) | 16.0 ± 1.9<br>(31%)<br>87.2 ± 7.8<br>(69%) | 4.4 ± 0.6<br>(86%)<br>30.7 ± 0.6<br>(14%) | 7.1 ± 4.7<br>(42%)<br>636.2 ± 47.8<br>(58%) | 4.8 ± 1.0<br>(18%)<br>29.9 ± 3.4<br>(42%)<br>617.6 ± 97.4<br>(40%) |

**Table S2:** Zeta potential of AgNPs after 1, 4, and 24h in selected media determined by ELS. The abbreviations of all media are explained in the Table 1 of the main manuscript.

| Media      | AOT AgNP    |             |             | PVP AgNP    |             |             | PLL AgNP    |             |             |
|------------|-------------|-------------|-------------|-------------|-------------|-------------|-------------|-------------|-------------|
|            | 1h          | 4h          | 24h         | 1h          | 4h          | 24h         | 1h          | 4h          | 24h         |
| DMEM       | -21.7 ± 0.6 | -24.5 ± 0.7 | -22.9 ± 1.1 | -8.2 ± 0.4  | -21.7 ± 0.5 | -22.2 ± 0.8 | 24.8 ± 1.5  | 24.4 ± 1.8  | 23.3 ± 1.0  |
| DMEM + BSA | -18.7 ± 2.4 | -20.4 ± 3.7 | -21.2 ± 3.2 | -18.2 ± 4.1 | -17.2 ± 3.8 | -18.1 ± 2.6 | -10.4 ± 4.2 | -11.4 ± 1.7 | -12.7 ± 2.5 |
| CYS        | -34.0 ± 2.4 | -34.1 ± 1.3 | -42.0 ± 1.9 | -24.4 ± 0.6 | -24.2 ± 1.2 | -26.6 ± 0.6 | 42.1 ± 2.9  | 32.1 ± 0.8  | 42.6 ± 3.2  |
| CYS + BSA  | -23.8 ± 2.4 | -26.7 ± 3.0 | -27.2 ± 2.1 | -21.2 ± 0.6 | -19.3 ± 1.4 | -20.1 ± 2.3 | -14.3 ± 1.1 | -15.0 ± 0.5 | -13.7 ± 2.8 |
| GSH        | -18.3 ± 1.7 | -20.5 ± 1.5 | -19.5 ± 0.5 | -13.6 ± 0.1 | -16.8 ± 0.5 | -18.3 ± 0.3 | 26.9 ± 0.4  | 28.8 ± 0.7  | 28.0 ± 2.0  |
| GSH + BSA  | -10.2 ± 2.6 | -16.1 ± 1.1 | -15.5 ± 3.8 | -8.9 ± 0.8  | -10.3 ± 0.6 | -9.9 ± 0.8  | -10.3 ± 0.9 | -10.3 ± 1.8 | -12.2 ± 1.0 |
| ALF        | -16.9 ± 0.9 | -19.4 ± 1.0 | -16.6 ± 0.5 | -8.6 ± 1.0  | -10.9 ± 1.2 | -9.2 ± 0.9  | -8.3 ± 0.7  | -8.1 ± 0.3  | -8.3 ± 0.4  |
| AGF        | 12.9 ± 1.9  | 12.4 ± 2.5  | 6.7 ± 0.4   | 0.1 ± 0.9   | 0.4 ± 1.5   | 0.6 ± 0.8   | 12.9 ± 1.3  | 10.3 ± 1.8  | 15.9 ± 1.0  |

**Table S3.** Percentages of Ag<sup>+</sup> dissolved after 0, 1, 4, and 24 h of exposure of AgNPs to selected media. The abbreviations of all media are explained in the Table 1 of the main manuscript.

| Media      | AOT AgNP |     |     |     | PVP AgNP |     |     |     | PLL AgNP |     |     |     |
|------------|----------|-----|-----|-----|----------|-----|-----|-----|----------|-----|-----|-----|
|            | 0h       | 1h  | 4h  | 24h | 0h       | 1h  | 4h  | 24h | 0h       | 1h  | 4h  | 24h |
| UPW        | 0.8      | 1.0 | 1.9 | 3.0 | 0.6      | 0.7 | 1.0 | 1.3 | 0.4      | 0.8 | 0.9 | 1.3 |
| DMEM       | 1.3      | 1.5 | 1.3 | 1.7 | 0.8      | 0.9 | 1.2 | 0.9 | 0.8      | 1.1 | 1.2 | 1.6 |
| DMEM + BSA | 0.5      | 0.7 | 0.8 | 0.6 | 0.4      | 0.6 | 0.7 | 1.0 | 0.6      | 0.7 | 0.7 | 0.9 |
| CYS        | 0.5      | 0.4 | 0.4 | 0   | 0.3      | 0.2 | 0.2 | 0   | 0.2      | 0.1 | 0.1 | 0   |
| CYS + BSA  | 0.3      | 0.4 | 0.5 | 0   | 0.2      | 0.3 | 0.5 | 0   | 0.4      | 0.2 | 0.2 | 0   |
| GSH        | 0        | 0   | 0   | 0   | 0        | 0   | 0   | 0   | 0        | 0   | 0   | 0   |
| GSH + BSA  | 0        | 0   | 0.1 | 0   | 0        | 0   | 0   | 0   | 0        | 0   | 0   | 0   |
| ALF        | 2.1      | 1.2 | 2.0 | 1.5 | 0.8      | 0.7 | 0.9 | 0.9 | 1.6      | 2.3 | 2.0 | 1.7 |
| AGF        | 2.5      | 2.3 | 2.2 | 1.5 | 1.1      | 1.3 | 1.5 | 1.4 | 2.1      | 2.2 | 2.4 | 2.2 |
